# Supplementary material
Source: Springer Nature journal article supplement (https://www.springermedizin.de/resource/supplementary/12889_2008_1202_MOESM1_ESM.pdf/9502678)
Supplement: MOESM1 [file 9502678]

## COMMUNITY LEVEL FACTORS

- Cluster type
- Region
- Mean maternal education in the cluster
- Mean paternal education in the cluster
- Mean household wealth index in the cluster
- Mean number of antenatal care visits in the cluster
- Percentage of newborns receiving postnatal care in the cluster
- Percentage of deliveries assisted by trained birth attendants in the cluster

## SOCIO-ECONOMIC STATUS

- Maternal marital status
- Maternal religion
- Maternal education
- Paternal education
- Parental occupation
- Paternal age when married
- Household wealth index

## PROXIMATE DETERMINANTS

### Maternal factor

Age at childbirth

### Neonatal factor

Sex  
Birth size  
Birth rank and  
birth interval

### Pre-delivery factor

Desire for  
pregnancy

### Delivery factor

Delivery assistance  
Delivery complications  
Mode of delivery  
Place of delivery

### Post-delivery factor

Postnatal care

**SURVIVE**

**DIED**
